# Supplementary material for: Motivation, Intention and Action: Wearing Masks to Prevent the Spread of COVID-19
Source: MDPI journal article supplement (doi:10.3390/covid2110109), 2022-10-24
Supplement: s1 [file s1]

## Survey Questionnaire

**Q1: Do you live in any of the following areas?**

- ☐ Hamilton and surrounding areas
- ☐ Christchurch and surrounding areas
- ☐ Wellington and surrounding areas
- ☐ Tauranga and surrounding areas
- ☐ Rotorua and surrounding areas

## Q2: Beliefs about Covid-19

We are interested in your opinions about Covid-19. How strongly do you agree or disagree with the following statements?

| Item                                                                                | Strongly agree           | Agree                    | Unsure/<br>neutral       | Disagree                 | Strongly disagree        |
|-------------------------------------------------------------------------------------|--------------------------|--------------------------|--------------------------|--------------------------|--------------------------|
| You cannot catch Covid-19 from people with the virus who do not have symptoms       | <input type="checkbox"/> |
| Covid-19 is only a danger to the elderly and people who already have health problem | <input type="checkbox"/> |
| Infected people spread Covid-19 by coughing and sneezing                            | <input type="checkbox"/> |
| Children cannot catch Covid-19                                                      | <input type="checkbox"/> |
| Once you have had Covid-19 you are immune to re-infection                           | <input type="checkbox"/> |
| I think Covid-19 is a hoax                                                          | <input type="checkbox"/> |
| Fears about Covid-19 are exaggerated                                                | <input type="checkbox"/> |
| Covid-19 most likely comes from bats                                                | <input type="checkbox"/> |
| Covid-19 is a man-made virus                                                        | <input type="checkbox"/> |
| Children are perfectly safe from Covid-19                                           | <input type="checkbox"/> |
| You can catch Covid-19 by touching anything handled by an infected person           | <input type="checkbox"/> |
| Covid-19 is no worse than the seasonal flu                                          | <input type="checkbox"/> |

### Q3: Beliefs about eliminating Covid-19

We are interested in your opinions about eliminating Covid-19. How strongly do you agree or disagree with the following statements?

| Item                                                                                        | Strongly agree           | Agree                    | Unsure/<br>neutral       | Disagree                 | Strongly disagree        |
|---------------------------------------------------------------------------------------------|--------------------------|--------------------------|--------------------------|--------------------------|--------------------------|
| We need to eliminate Covid-19 from New Zealand to save lives                                | <input type="checkbox"/> |
| We should just live with it until we have a vaccine                                         | <input type="checkbox"/> |
| It would be better to let it spread and build herd immunity                                 | <input type="checkbox"/> |
| There is no point trying to eliminate Covid-19 because it is a virus and will keep changing | <input type="checkbox"/> |
| Covid-19 is everywhere in the world so there is no way we can keep it out                   | <input type="checkbox"/> |

#### Q4: Taking responsibility and action

We are interested in how strongly you feel about the need for action to be taken to eliminate Covid-19 from New Zealand. How strongly do you agree or disagree with the following statements?

| Item                                                                                                        | Strongly agree           | Agree                    | Unsure/<br>neutral       | Disagree                 | Strongly disagree        |
|-------------------------------------------------------------------------------------------------------------|--------------------------|--------------------------|--------------------------|--------------------------|--------------------------|
| Eliminating Covid-19 from New Zealand is the right thing to do                                              | <input type="checkbox"/> |
| I feel some responsibility for eliminating Covid-19 from New Zealand                                        | <input type="checkbox"/> |
| I am prepared to change my normal behaviour to eliminate Covid-19 from New Zealand                          | <input type="checkbox"/> |
| It is important to work together to eliminate Covid-19 from New Zealand                                     | <input type="checkbox"/> |
| Nearly everyone I know thinks eliminating Covid-19 from New Zealand is the right thing to do                | <input type="checkbox"/> |
| Most people I know feel some responsibility for eliminating Covid-19 from New Zealand                       | <input type="checkbox"/> |
| I think nearly everyone is prepared to change their normal behaviour to eliminate Covid-19 from New Zealand | <input type="checkbox"/> |
| I am prepared to make sacrifices to eliminate Covid-19 from New Zealand                                     | <input type="checkbox"/> |
| Most people are prepared to make sacrifices to eliminate Covid-19 from New Zealand                          | <input type="checkbox"/> |
| Most people know we must work together to eliminate Covid-19 from New Zealand                               | <input type="checkbox"/> |

### Q5: Involvement with eliminating Covid-19 from New Zealand

We are interested in your opinions about eliminating Covid-19 from New Zealand. How strongly do you agree or disagree with the following statements?

| Item                                                                                                   | Strongly agree           | Agree                    | Unsure/<br>neutral       | Disagree                 | Strongly disagree        |
|--------------------------------------------------------------------------------------------------------|--------------------------|--------------------------|--------------------------|--------------------------|--------------------------|
| I think helping to eliminate Covid-19 from New Zealand is rewarding                                    | <input type="checkbox"/> |
| The consequences are serious if we don't eliminate Covid-19 from New Zealand                           | <input type="checkbox"/> |
| Eliminating Covid-19 from New Zealand is something I am passionate about                               | <input type="checkbox"/> |
| It would be a big deal if government made mistakes while we try to eliminate Covid-19 from New Zealand | <input type="checkbox"/> |
| My position on eliminating Covid-19 from New Zealand tells others something about me                   | <input type="checkbox"/> |
| Eliminating Covid-19 from New Zealand is important to me                                               | <input type="checkbox"/> |
| Making decisions about how to eliminate Covid-19 from New Zealand is complicated                       | <input type="checkbox"/> |
| What others think about eliminating Covid-19 from New Zealand tells me something about them            | <input type="checkbox"/> |
| I care a lot about eliminating Covid-19 from New Zealand                                               | <input type="checkbox"/> |
| Making decisions about how to eliminate Covid-19 from New Zealand is difficult                         | <input type="checkbox"/> |

### Q6: Involvement with wearing face masks to help eliminate Covid-19?

The government may require you to wear a face mask in public as one measure to eliminate Covid-19 from New Zealand. How strongly do you agree or disagree with the following statements about wearing face masks?

| Item                                                                                                 | Strongly agree           | Agree                    | Unsure/<br>neutral       | Disagree                 | Strongly disagree        |
|------------------------------------------------------------------------------------------------------|--------------------------|--------------------------|--------------------------|--------------------------|--------------------------|
| I think it's rewarding to wear a face mask to help eliminate Covid-19                                | <input type="checkbox"/> |
| The consequences are serious if I made mistakes with wearing a face mask to help eliminate Covid-19  | <input type="checkbox"/> |
| Wearing a face mask to help eliminate Covid-19 is something I am passionate about                    | <input type="checkbox"/> |
| It would be a big deal if I made a mistake with wearing a face mask to help eliminate Covid-19       | <input type="checkbox"/> |
| My position about wearing a face mask to help eliminate Covid-19 tells others something about me     | <input type="checkbox"/> |
| Wearing a face mask to help eliminate Covid-19 is important to me                                    | <input type="checkbox"/> |
| Making decisions about wearing a face mask to help eliminate Covid-19 is complicated                 | <input type="checkbox"/> |
| What others think about wearing a face mask to help eliminate Covid-19 tells me something about them | <input type="checkbox"/> |
| I care a lot about wearing a face mask to help eliminate Covid-19                                    | <input type="checkbox"/> |
| Making decisions about wearing a face mask to help eliminate Covid-19 is difficult                   | <input type="checkbox"/> |

**Q7: Attitude towards wearing a face mask to stop the spread Covid-19**

How strongly do you agree or disagree with the following statements about wearing face masks to stop the spread of Covid-19?

| Item                                                                               | Strongly agree           | Agree                    | Unsure/<br>neutral       | Disagree                 | Strongly disagree        |
|------------------------------------------------------------------------------------|--------------------------|--------------------------|--------------------------|--------------------------|--------------------------|
| I think face masks should be worn to help stop the spread of Covid-19              | <input type="checkbox"/> |
| I think wearing face masks to stop the spread of Covid-19 is the right thing to do | <input type="checkbox"/> |
| I believe it is wrong to wear face masks to stop the spread of Covid-19            | <input type="checkbox"/> |
| I think it would be good to wear face masks to stop the spread of Covid-19         | <input type="checkbox"/> |

**Q8: Which one of the following statements best describes you?**

Please choose one

| Item                                                             | Describes me             |
|------------------------------------------------------------------|--------------------------|
| I really think wearing face masks is the right thing to do       | <input type="checkbox"/> |
| It doesn't really matter to me whether or not I wear a face mask | <input type="checkbox"/> |
| I am not really sure if wearing face masks is the best way to go | <input type="checkbox"/> |
| I haven't put much thought into wearing face masks               | <input type="checkbox"/> |
| I strongly believe that wearing face masks is a bad thing to do  | <input type="checkbox"/> |

**Q9: Perceived advantages and disadvantages of wearing face masks to help stop the spread of Covid-19**

How strongly do you agree or disagree with the following statements about wearing face masks to help stop the spread of Covid-19?

| Item                                                                                                     | Strongly agree           | Agree                    | Unsure/<br>neutral       | Disagree                 | Strongly disagree        |
|----------------------------------------------------------------------------------------------------------|--------------------------|--------------------------|--------------------------|--------------------------|--------------------------|
| Face masks are effective in preventing the spread of Covid-19                                            | <input type="checkbox"/> |
| Wearing face masks to stop the spread of Covid-19 is just not practical                                  | <input type="checkbox"/> |
| Face masks are not much help in stopping the spread of Covid-19 because people do not wear them properly | <input type="checkbox"/> |
| Face masks on their own are not much help in preventing the spread of Covid-19                           | <input type="checkbox"/> |
| You should only have to wear a face mask if you feel unwell                                              | <input type="checkbox"/> |
| You should only have to wear a face mask if you are old or have a health problem                         | <input type="checkbox"/> |
| Face masks are not much help unless you wear gloves as well                                              | <input type="checkbox"/> |
| Home-made face masks are a waste of time and effort                                                      | <input type="checkbox"/> |
| Face masks are just too uncomfortable                                                                    | <input type="checkbox"/> |
| The kind of face masks we can buy are not worth bothering with                                           | <input type="checkbox"/> |
| Wearing face mask sets a good example to others                                                          | <input type="checkbox"/> |
| People who wear face masks are over-reacting                                                             | <input type="checkbox"/> |
| Wearing face masks should be compulsory                                                                  | <input type="checkbox"/> |
| Face masks are too difficult and inconvenient if you wear glasses                                        | <input type="checkbox"/> |

**Q10: Did you wear a face mask whenever you went out in public last week?**

Always Often Sometimes Rarely Never NA

**Q11: Did you wear a face mask if you had to go out to work last week?**

Always Often Sometimes Rarely Never NA



### Q12: Involvement with self-isolating to help eliminate Covid-19?

Staying at home if you feel unwell is one strategy the government is using to help eliminate Covid-19 from New Zealand. How strongly do you agree or disagree with the following statements about staying at home if you feel unwell?

| Item                                                                                         | Strongly agree           | Agree                    | Unsure/<br>neutral       | Disagree                 | Strongly disagree        |
|----------------------------------------------------------------------------------------------|--------------------------|--------------------------|--------------------------|--------------------------|--------------------------|
| I think staying at home if you feel unwell to help eliminate Covid-19 would be rewarding     | <input type="checkbox"/> |
| The consequences would be serious if I made a mistake about staying at home if I felt unwell | <input type="checkbox"/> |
| I am passionate about staying at home if I feel unwell                                       | <input type="checkbox"/> |
| Making mistakes about staying at home if you are feeling unwell are a big deal               | <input type="checkbox"/> |
| My position about staying at home if I feel unwell tells others something about me           | <input type="checkbox"/> |
| Staying at home if I feel unwell is important to me                                          | <input type="checkbox"/> |
| Making decisions about staying at home if I feel unwell is complicated                       | <input type="checkbox"/> |
| What others think about staying at home if they feel unwell tells me something about them    | <input type="checkbox"/> |
| I care a lot about the need to stay home if I feel unwell                                    | <input type="checkbox"/> |
| Making decisions about staying at home if I feel unwell is difficult                         | <input type="checkbox"/> |

**Q13: Attitude towards staying at home if you were unwell**

How strongly do you agree or disagree with the following statements about staying at home if you feel unwell?

| Item                                                                | Strongly agree           | Agree                    | Unsure/<br>neutral       | Disagree                 | Strongly disagree        |
|---------------------------------------------------------------------|--------------------------|--------------------------|--------------------------|--------------------------|--------------------------|
| I think people should stay at home if they feel unwell              | <input type="checkbox"/> |
| I think staying at home if you feel unwell is the right thing to do | <input type="checkbox"/> |
| I believe it is wrong to stay at home if you feel unwell            | <input type="checkbox"/> |
| I think it is a good thing if people who feel unwell stay at home   | <input type="checkbox"/> |

**Q14: Which of the following statements best describes you?**

Please choose one

| Item                                                                                  | Describes me             |
|---------------------------------------------------------------------------------------|--------------------------|
| I really think staying at home if you feel unwell is the right thing to do            | <input type="checkbox"/> |
| It doesn't really matter to me whether or not people stay at home if they feel unwell | <input type="checkbox"/> |
| I am not really sure that staying at home if you feel unwell is the best way to go    | <input type="checkbox"/> |
| I haven't put much thought into staying at home if you feel unwell                    | <input type="checkbox"/> |
| I strongly believe that staying at home if you feel unwell is a bad thing to do       | <input type="checkbox"/> |

**Q15: Perceived advantages and disadvantages of staying at home if you feel unwell**

How strongly do you agree or disagree with the following statements about staying at home if you feel unwell?

| Item                                                                                 | Strongly agree           | Agree                    | Unsure/<br>neutral       | Disagree                 | Strongly disagree        |
|--------------------------------------------------------------------------------------|--------------------------|--------------------------|--------------------------|--------------------------|--------------------------|
| Staying at home if you feel unwell is effective in preventing the spread of Covid-19 | <input type="checkbox"/> |
| Staying at home if you feel unwell is just not practical                             | <input type="checkbox"/> |
| I think staying at home if you were unwell would be depressing                       | <input type="checkbox"/> |
| I couldn't afford the time off work to stay home if I was unwell                     | <input type="checkbox"/> |
| You should only stay at home if you have all the right symptoms                      | <input type="checkbox"/> |
| You should only have to stay at home if you are old or already have a health problem | <input type="checkbox"/> |
| Staying home if you are unwell is not much help if you don't get tested              | <input type="checkbox"/> |
| Staying at home if you feel unwell is a waste of time and effort                     | <input type="checkbox"/> |

**Q16: Thinking about the next few days, would you stay home if you were unwell or have any of the following symptoms: a dry cough, fever, loss of sense of smell, loss of sense of taste, shortness of breath or difficulty breathing?**

|                          |                          |                          |                          |                          |
|--------------------------|--------------------------|--------------------------|--------------------------|--------------------------|
| Definitely               | Probably                 | Maybe                    | Probably not             | Definitely not           |
| <input type="checkbox"/> |

**Q17: If you were advised to do so by a healthcare professional or public health authority would you self-isolate for 14 days?**

|                          |                          |                          |                          |                          |
|--------------------------|--------------------------|--------------------------|--------------------------|--------------------------|
| Definitely               | Probably                 | Maybe                    | Probably not             | Definitely not           |
| <input type="checkbox"/> |

### Q18: Involvement with testing to help eliminate Covid-19?

Testing for Covid-19 is one strategy the government is using to help eliminate the virus from New Zealand. How strongly do you agree or disagree with the following statements about testing?

| Item                                                                               | Strongly agree           | Agree                    | Unsure/<br>neutral       | Disagree                 | Strongly disagree        |
|------------------------------------------------------------------------------------|--------------------------|--------------------------|--------------------------|--------------------------|--------------------------|
| I think getting tested to help eliminate Covid-19 is rewarding                     | <input type="checkbox"/> |
| The consequences are serious if I make a mistake about getting tested for Covid-19 | <input type="checkbox"/> |
| Getting tested for Covid-19 is something I am passionate about                     | <input type="checkbox"/> |
| It would be a big deal if I made a mistake with getting tested for Covid-19        | <input type="checkbox"/> |
| My position about getting tested for Covid-19 tells others something about me      | <input type="checkbox"/> |
| Getting tested for Covid-19 is important to me                                     | <input type="checkbox"/> |
| Making decisions about getting tested for Covid-19 is complicated                  | <input type="checkbox"/> |
| What others think about getting tested for Covid-19 tells me something about them  | <input type="checkbox"/> |
| I care a lot about getting tested for Covid-19                                     | <input type="checkbox"/> |
| Making decisions about getting tested for Covid-19 is difficult                    | <input type="checkbox"/> |

**Q19: Attitude towards getting tested for Covid-19**

How strongly do you agree or disagree with the following statements about getting testing for Covid-19?

| Item                                                         | Strongly agree           | Agree                    | Unsure/<br>neutral       | Disagree                 | Strongly disagree        |
|--------------------------------------------------------------|--------------------------|--------------------------|--------------------------|--------------------------|--------------------------|
| I think people should get tested for Covid-19                | <input type="checkbox"/> |
| I think getting tested for Covid-19 is the right thing to do | <input type="checkbox"/> |
| I believe it is wrong to test people for Covid-19            | <input type="checkbox"/> |
| I think it is good to test people for Covid-19               | <input type="checkbox"/> |

**Q20: Which of the following statements best describes you?**

Please choose one

| Item                                                                         | Describes me             |
|------------------------------------------------------------------------------|--------------------------|
| I really think testing people for Covid-19 is the right thing to do          | <input type="checkbox"/> |
| It doesn't really matter to me whether or not people are tested for Covid-19 | <input type="checkbox"/> |
| I am not really sure if testing people for Covid-19 is the best way to go    | <input type="checkbox"/> |
| I haven't put much thought into testing people for Covid-19                  | <input type="checkbox"/> |
| I strongly believe that testing people for Covid-19 is a bad thing to do     | <input type="checkbox"/> |

**Q21: Perceived advantages and disadvantages of testing people for Covid-19**

How strongly do you agree or disagree with the following statements about testing people for Covid-19?

| Item                                                                       | Strongly agree           | Agree                    | Unsure/<br>neutral       | Disagree                 | Strongly disagree        |
|----------------------------------------------------------------------------|--------------------------|--------------------------|--------------------------|--------------------------|--------------------------|
| Testing people is effective in preventing the spread of Covid-19           | <input type="checkbox"/> |
| Testing people to stop the spread of Covid-19 is just not is not practical | <input type="checkbox"/> |
| The tests for Covid-19 are too unreliable                                  | <input type="checkbox"/> |
| I couldn't afford the time off work if I tested positive                   | <input type="checkbox"/> |
| You should only get tested if you have the right symptoms                  | <input type="checkbox"/> |
| You should only get tested if you are old or have a health problem         | <input type="checkbox"/> |
| Testing is not much help if you only test sick people                      | <input type="checkbox"/> |
| Getting tested is a waste of time and effort                               | <input type="checkbox"/> |
| Testing is painful and uncomfortable                                       | <input type="checkbox"/> |
| Testing takes so long it's not worth bothering with                        | <input type="checkbox"/> |

**Q22: Have you been tested for Covid-19?****Yes****No**

If answer to Q20 is 'Yes' then ask Q21, otherwise go to B1

**Q23: Did you feel unwell at the time you were tested?****Yes****No**

We just have a few questions to make sure we get a good cross-section of people.

**Q24: What age bracket do you fit into?**

- ☐ 18-29 years
- ☐ 30-39 years
- ☐ 40-49 years
- ☐ 50-59 years
- ☐ 60-69 years
- ☐ 70 years and over
- ☐ Prefer not to say

**Q25: Which of the following do you identify as?**

- ☐ Male
- ☐ Female
- ☐ Gender diverse
- ☐ Prefer not to say

**Q26: What is your highest level of formal education?**

- ☐ Some or all of secondary school
- ☐ Certificate (1-6)
- ☐ Diploma (5-7)
- ☐ Bachelor degree
- ☐ Post-graduate diploma/certificate
- ☐ Post-graduate degree
- ☐ Prefer not to say

**Q27: Your family? Please tick all that apply**

- ☐ Do you have school-age children
- ☐ Do you have adult children
- ☐ Do you have pre-school children
- ☐ Do you have parents who are retired
- ☐ Do you have parents living in a rest home
- ☐ Does any member of your family have a serious medical condition

☐ Prefer not to say

**Q28: What is your postcode?**

**Q29: What is your ethnicity?**

- ☐ Māori
- ☐ European New Zealander
- ☐ Pacific Islander
- ☐ Asian
- ☐ Other

**Q30: What household income bracket do you fit into?**

- ☐ Less than \$20,000
- ☐ \$20,000 to \$50,000
- ☐ \$50,000 to \$70,000
- ☐ \$70,000 to \$100,000
- ☐ more than \$100,000
- ☐ Prefer not to say

**Q31: How do you earn your income? Please tick any that apply**

- ☐ Business owner - retail
- ☐ Business owner - manufacturing
- ☐ Business owner - other
- ☐ Full-time employee - retail
- ☐ Full-time employee - manufacturing
- ☐ Full-time employee - other
- ☐ Part-time employee - retail
- ☐ Part-time employee - manufacturing
- ☐ Part-time employee - other



- ☐ ( ) Not presently in employment
- ☐ ( ) Casual employee – retail
- ☐ ( ) Casual employee – manufacturing
- ☐ ( ) Casual employee - other

**Q32: Over the past week did you watch, read or listen for news about Covid-19 on:**

- ☐ ( ) Twitter
- ☐ ( ) Facebook
- ☐ ( ) Instagram
- ☐ ( ) Youtube
- ☐ ( ) Snapchat
- ☐ ( ) WeChat
- ☐ ( ) Other social app

**Q33: Did you watch a video about Covid19 on facebook**

- ☐ ( ) Yes
- ☐ ( ) No

**Q34 : Was the video on a group page or your own home page?**

- ☐ ( ) Group page
- ☐ ( ) My own home page
- ☐ ( ) Not sure

**Q35 Were you directed to the video by a link from another app?**

- ☐ ( ) No
- ☐ ( ) Yes
- ☐ ( ) Not sure

**Q36: Over the past week did you watch, read or listen for news about Covid-19 on:**

- ☐ Television
- ☐ Radio
- ☐ Newspapers
- ☐ Magazines
- ☐ Other mainstream media

**Q37: Over the past week did you chat about Covid-19?**

- ☐ With your family or friends
- ☐ With your co-workers
- ☐ In an on-line chat room
- ☐ In an online blog
- ☐ With your doctor or chemist

**Q38: And finally, ...** if there is an opportunity, would you be willing to be interviewed to help us understand your answers in more detail?

**If yes, can you give us your email and phone number?**

**That is the end of the survey. Do you have any questions?**

**Thank you so much for participating in our survey.**

**That is the end of the survey. Do you have any questions?**

**Thank you so much for participating in our survey.**
